# Supplementary material for: A Novel Universal Primer Multiplex Real-Time PCR (UP-M-rtPCR) Approach for Specific Identification and Quantitation of Cat, Dog, Fox, and Mink Fractions Using Nuclear DNA Sequences
Source: MDPI journal article supplement (doi:10.3390/foods12030594), 2023-01-31
Supplement: s1 [file s1]

**Table S2.** Cq values of binary meat mixtures with different proportions of cat, dog, fox, or mink meat (5%, 0.5%, and 0.05%).

| Species | Proportion (%) | Average Cq $\pm$ SD | CV (%) |
|---------|----------------|---------------------|--------|
| Cat     | 5              | 26.96 $\pm$ 0.06    | 0.22   |
|         | 0.5            | 29.95 $\pm$ 0.03    | 0.10   |
|         | 0.05           | 33.67 $\pm$ 0.25    | 0.74   |
| Dog     | 5              | 29.39 $\pm$ 0.06    | 0.20   |
|         | 0.5            | 32.04 $\pm$ 0.10    | 0.31   |
|         | 0.05           | 35.72 $\pm$ 0.09    | 0.25   |
| Fox     | 5              | 29.51 $\pm$ 0.11    | 0.37   |
|         | 0.5            | 32.36 $\pm$ 0.04    | 0.12   |
|         | 0.05           | 35.73 $\pm$ 0.16    | 0.45   |
| Mink    | 5              | 29.51 $\pm$ 0.03    | 0.10   |
|         | 0.5            | 32.61 $\pm$ 0.03    | 0.09   |
|         | 0.05           | 35.79 $\pm$ 0.09    | 0.25   |
