# Supplementary material for: A Novel Universal Primer Multiplex Real-Time PCR (UP-M-rtPCR) Approach for Specific Identification and Quantitation of Cat, Dog, Fox, and Mink Fractions Using Nuclear DNA Sequences
Source: MDPI journal article supplement (doi:10.3390/foods12030594), 2023-01-31
Supplement: s1 [file s1]

**Table S1.** Cq values of 10-fold diluted cat, dog, fox, or mink DNA (5, 0.5, and 0.05 ng/ $\mu$ L).

| Species | Concentration<br>(ng/ $\mu$ L) | Average Cq $\pm$ SD | CV (%) |
|---------|--------------------------------|---------------------|--------|
| Cat     | 5                              | 27.65 $\pm$ 0.32    | 1.16   |
|         | 0.5                            | 30.47 $\pm$ 0.10    | 0.33   |
|         | 0.05                           | 34.07 $\pm$ 0.03    | 0.09   |
| Dog     | 5                              | 28.47 $\pm$ 0.04    | 0.14   |
|         | 0.5                            | 31.6 $\pm$ 0.03     | 0.09   |
|         | 0.05                           | 34.84 $\pm$ 0.13    | 0.37   |
| Fox     | 5                              | 28.08 $\pm$ 0.10    | 0.35   |
|         | 0.5                            | 31.89 $\pm$ 0.15    | 0.47   |
|         | 0.05                           | 34.55 $\pm$ 0.16    | 0.46   |
| Mink    | 5                              | 27.17 $\pm$ 0.15    | 0.55   |
|         | 0.5                            | 31.23 $\pm$ 0.10    | 0.32   |
|         | 0.05                           | 34.03 $\pm$ 0.24    | 0.71   |
